# Supplementary material for: Nanostructured Oxide (SnO2, FTO) Thin Films for Energy Harvesting: A Significant Increase in Thermoelectric Power at Low Temperature
Source: MDPI journal article supplement (doi:10.3390/mi15020188), 2024-01-26
Supplement: s1 [file s1]

# Nanostructured Oxide (SnO<sub>2</sub>, FTO) Thin Films for Energy Harvesting: A Significant Increase in Thermoelectric Power at Low Temperature

Karuppiyah Deva Arun Kumar<sup>1,2\*</sup>, S. Valanarasu<sup>2</sup>, Alex Capelle<sup>1</sup>, Sibel Nar<sup>1,3</sup>,  
Wael Karim<sup>1</sup>, Arnaud Stolz<sup>1</sup>, Barthélemy Aspe<sup>1</sup>, Nadjib Semmar<sup>1\*</sup>

<sup>1</sup>Groupe de Recherches sur l'Énergétique des Milieux Ionisés, GREMI, Université d'Orléans, CNRS, 14 Rue d'Issoudun, 45067, France

<sup>2</sup>Department of Physics, Arul Anandar College, - 625514, Madurai, India

<sup>3</sup>Laboratoire Nanotechnologies et Nanosystèmes (LN2)-CNRS IRL-3463, Université de Sherbrooke, 3000 Boulevard Université, Sherbrooke, Québec, J1K OA5, Canada

Corresponding email: deva-arun-kumar.karuppiyah@univ-orleans.fr & nadjib.semmar@univ-orleans.fr

## Supplementary materials:

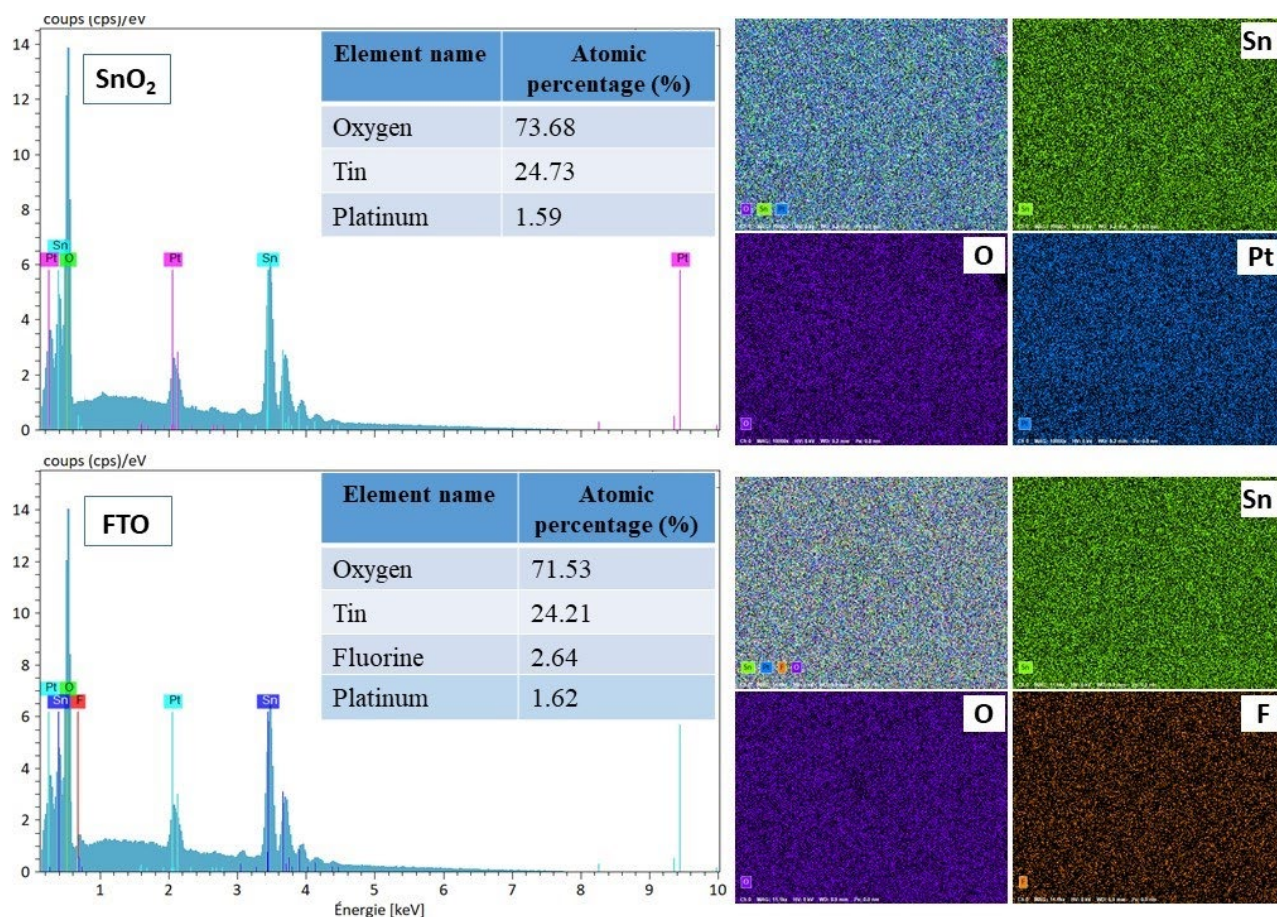

**Figure S1** EDX imaging records the synthesized thin films of SnO<sub>2</sub> and FTO, along with elemental mapping images for each individual element.

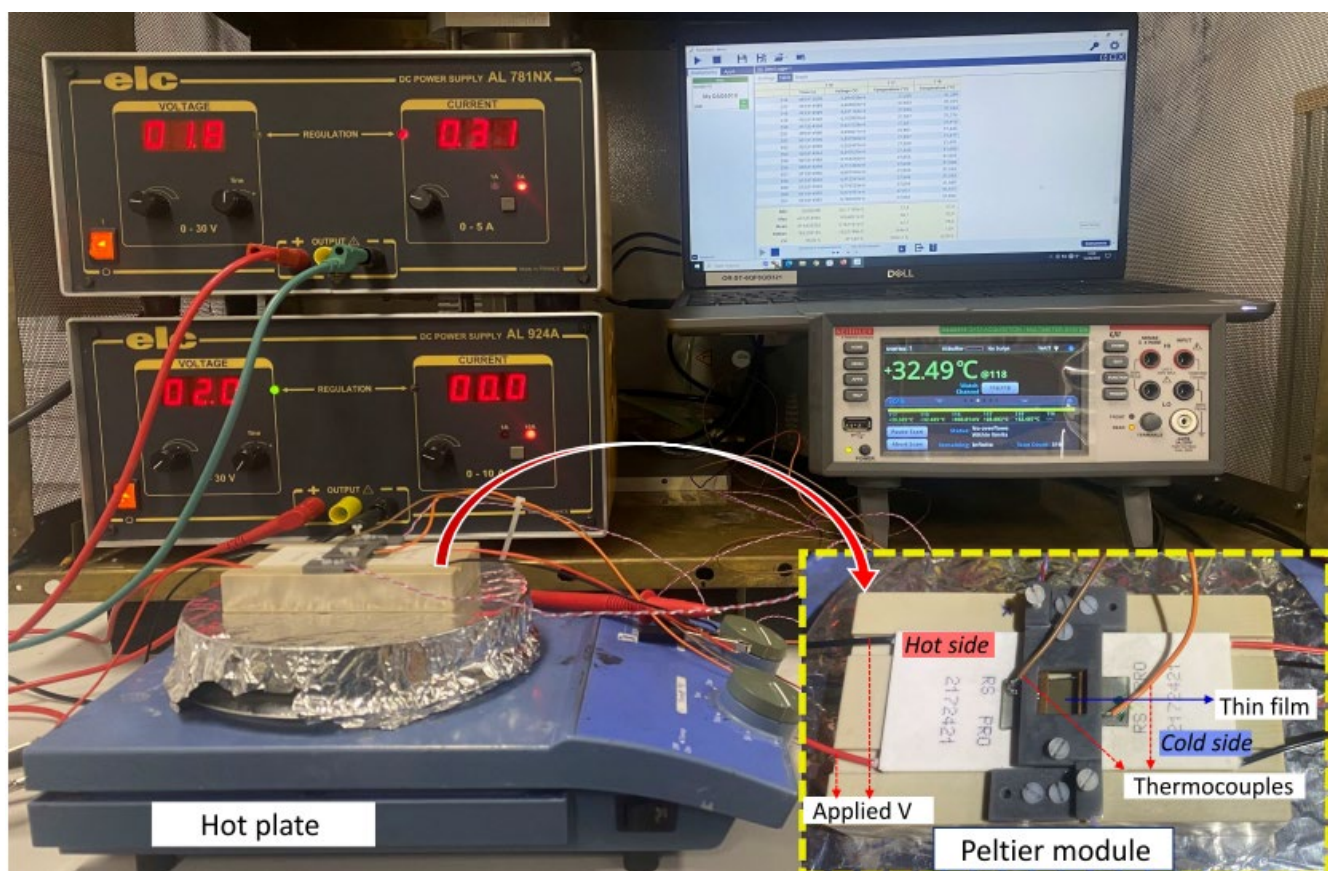

**Figure S2** Peltier module based-homemade Seebeck coefficient measurement with the temperature range from 300 K to 360 K.

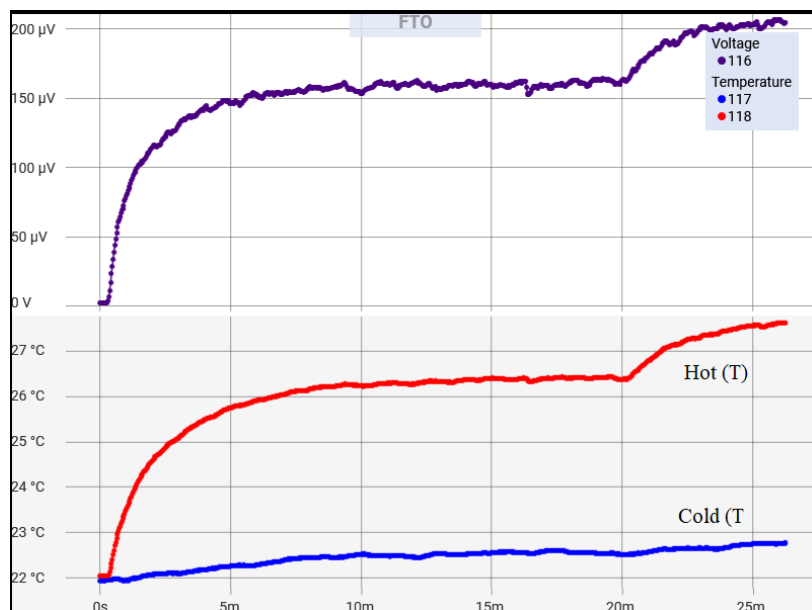

**Figure S3** Example of heating sequence for establishing  $\Delta T$  in a temperature range from 22 °C to 28 °C along with corresponding  $\Delta V$  for FTO thin film

By varying the electrical current ( $I$ ) into the Peltier module, there is a temperature variation occurs in two different sources such as hot side  $T_h$  and the cold side  $T_c$ . Data acquirement was carried out and monitored with respect to the real time. There are several parameters were recorded such as temperature (hot side and cold side), potential voltage difference ( $\Delta V$ ) and different acquisition times. The measurement time is relatively same for both synthesized thin films. To estimate the Seebeck coefficient ( $S$ ) value, a heating sequence was performed over a temperature range from 22 °C to 28 °C (for this study; from 22 °C to 85 °C). Once  $T_h$  and  $T_c$  was stabilized, the temperature gradient  $\Delta T$  ( $T_h - T_c$ ) was determined followed by  $\Delta V$  was estimated as shown in figure S3.
